# Supplementary material
Source: PubMed Central journal article supplement (PMC4064463)
Supplement: NIHMS591067-supplement-1.pdf [file NIHMS591067-supplement-1.pdf]

## Supplementary Figures

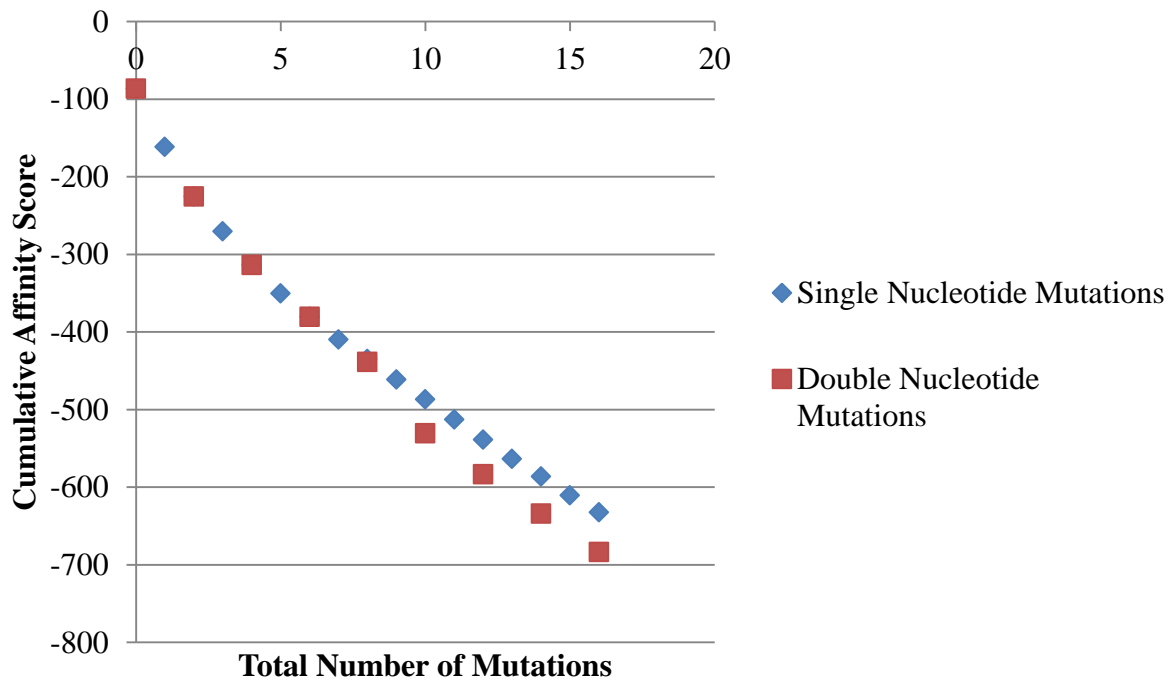

### Supplementary Figure 1.

*Comparison of single- and double-nucleotide greedy algorithms.* Nucleosome affinity was minimized for the *CYCI* promoter using a greedy algorithm searching over all possible single nucleotide substitutions per round (used in this study) and a modified algorithm which takes into consideration of all double nucleotide substitutions. It can be seen that the algorithm considering double nucleotide substitutions performs slightly better than the single nucleotide algorithm.

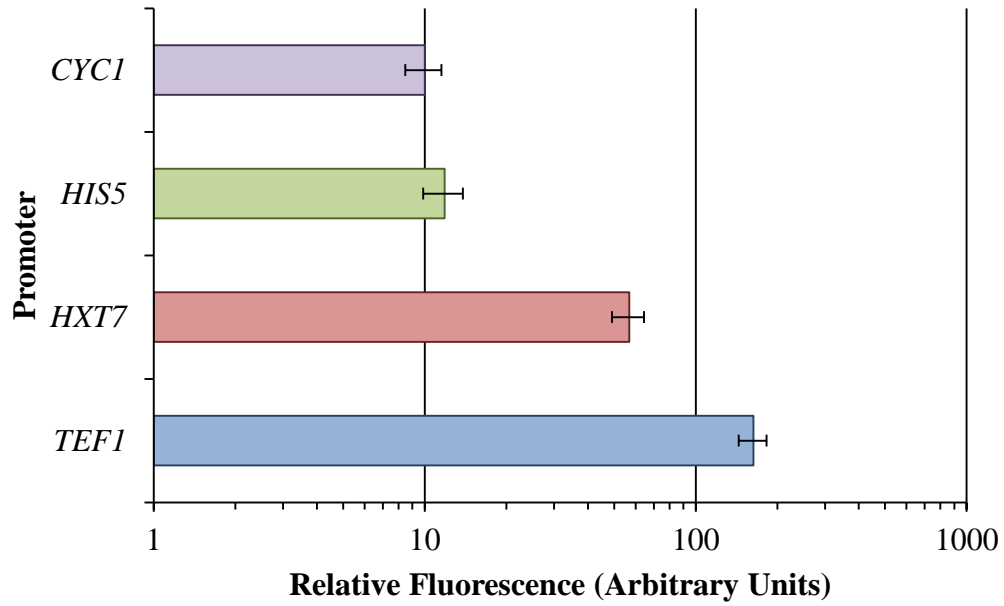

**Supplementary Figure 2.**

Expression levels of wild-type promoter scaffolds used in this study. Error bars represent standard deviation from three biological replicates.

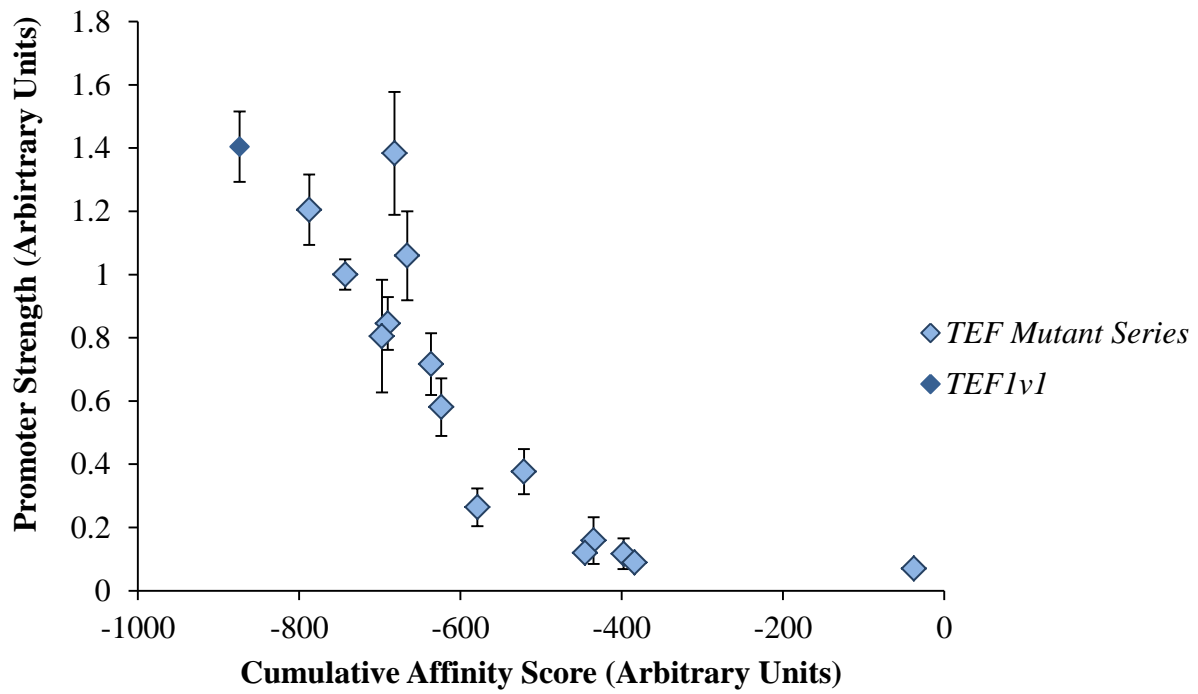

**Supplementary Figure 3.**

Experimental promoter strength as a function of the cumulative predicted nucleosome affinity scores for the *TEF1* mutant promoter series and for the redesigned variant, *TEF1v1*. Promoter strength was measured via flow cytometry with strains expressing a yellow fluorescent protein gene, *yECitrine*. Error bars represent standard deviation of biological triplicates.

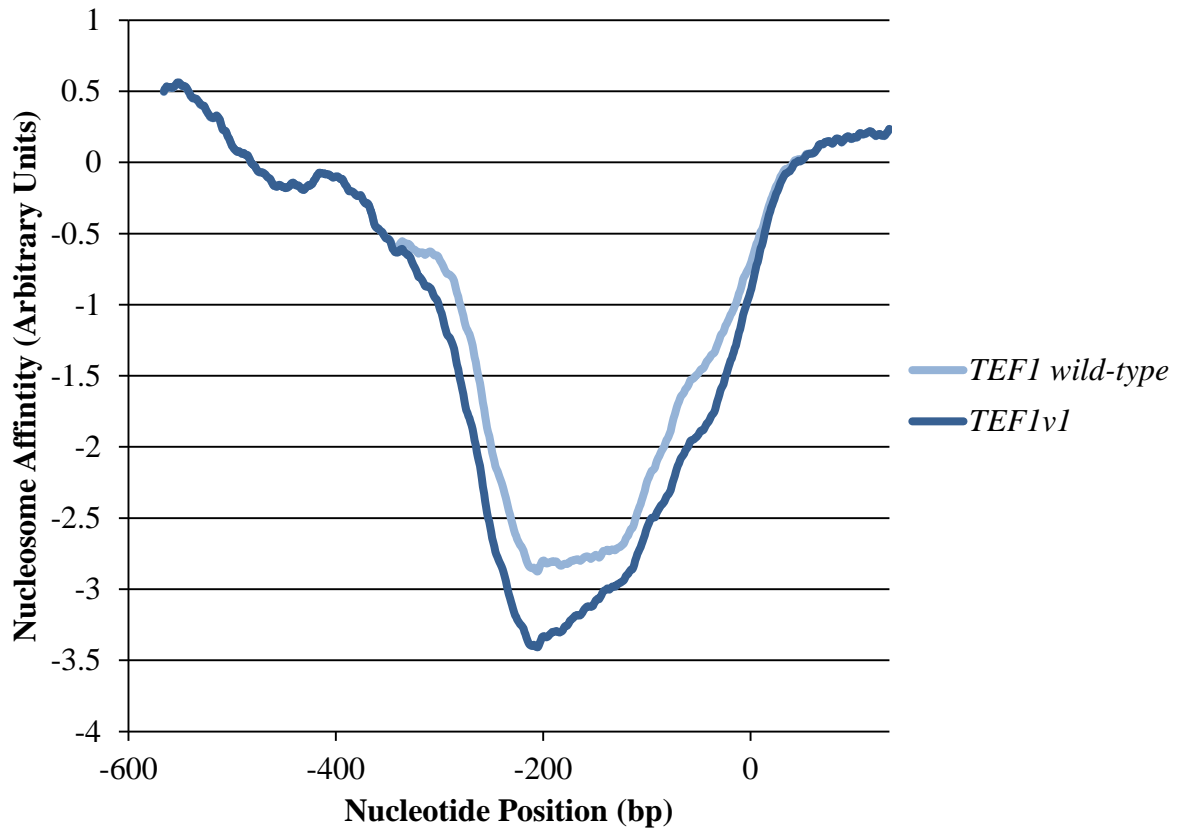

**Supplementary Figure 4.**

Computational nucleosome affinity profiles generated using a hidden Markov model<sup>1</sup> for *TEF1v1* and *TEF1* wild-type.

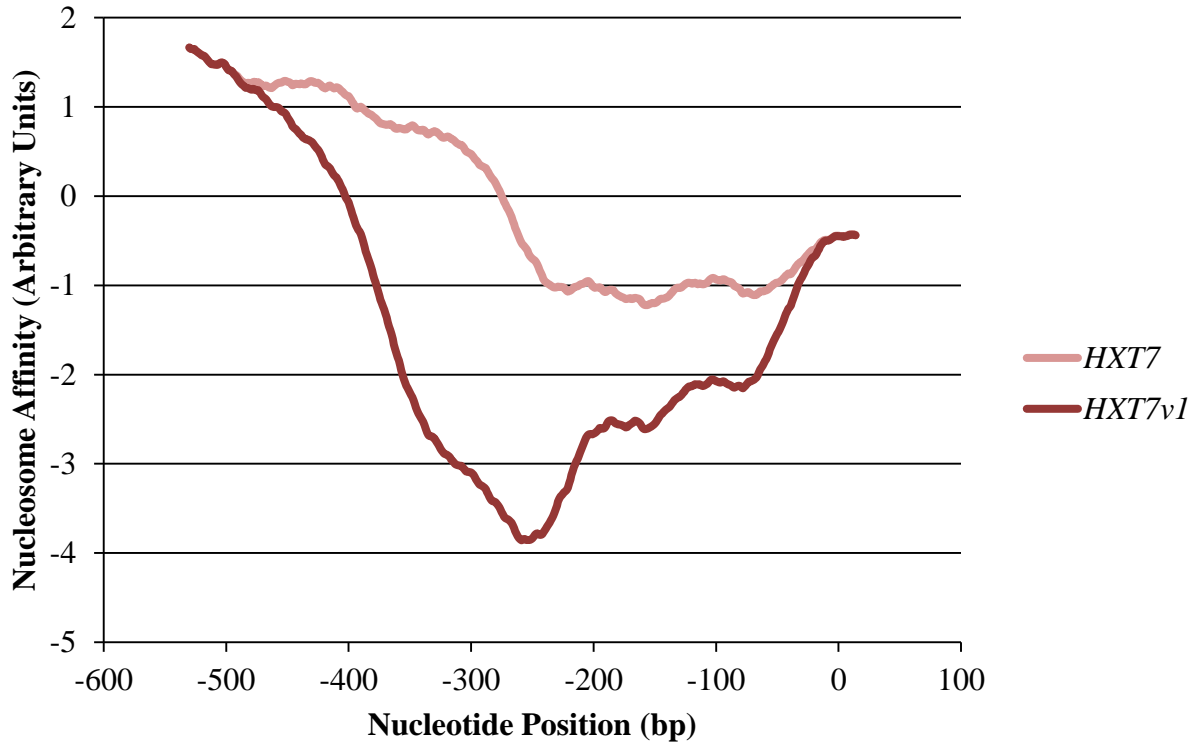

**Supplementary Figure 5.**

Computational nucleosome affinity profiles generated using a hidden Markov model<sup>1</sup> for *HXT7v1* and *HXT7* wild-type.

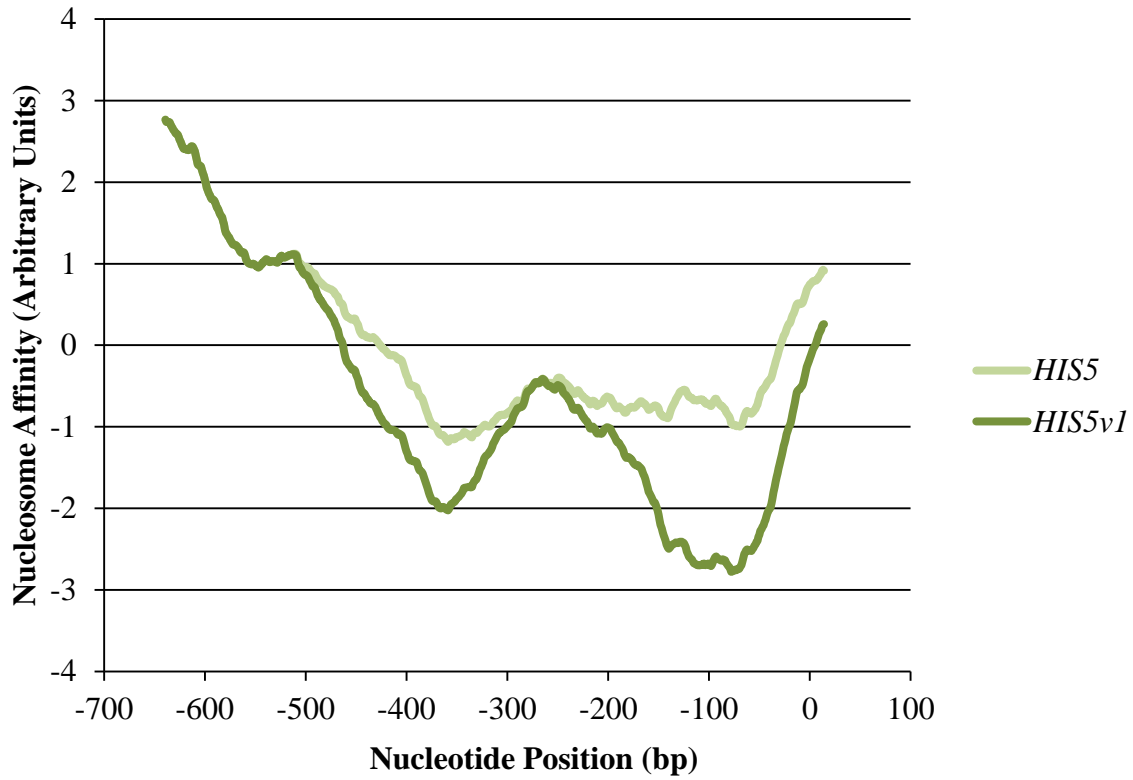

**Supplementary Figure 6.**

Computational nucleosome affinity profiles generated using a hidden Markov model<sup>1</sup> for *HIS5v1* and *HIS5* wild-type.

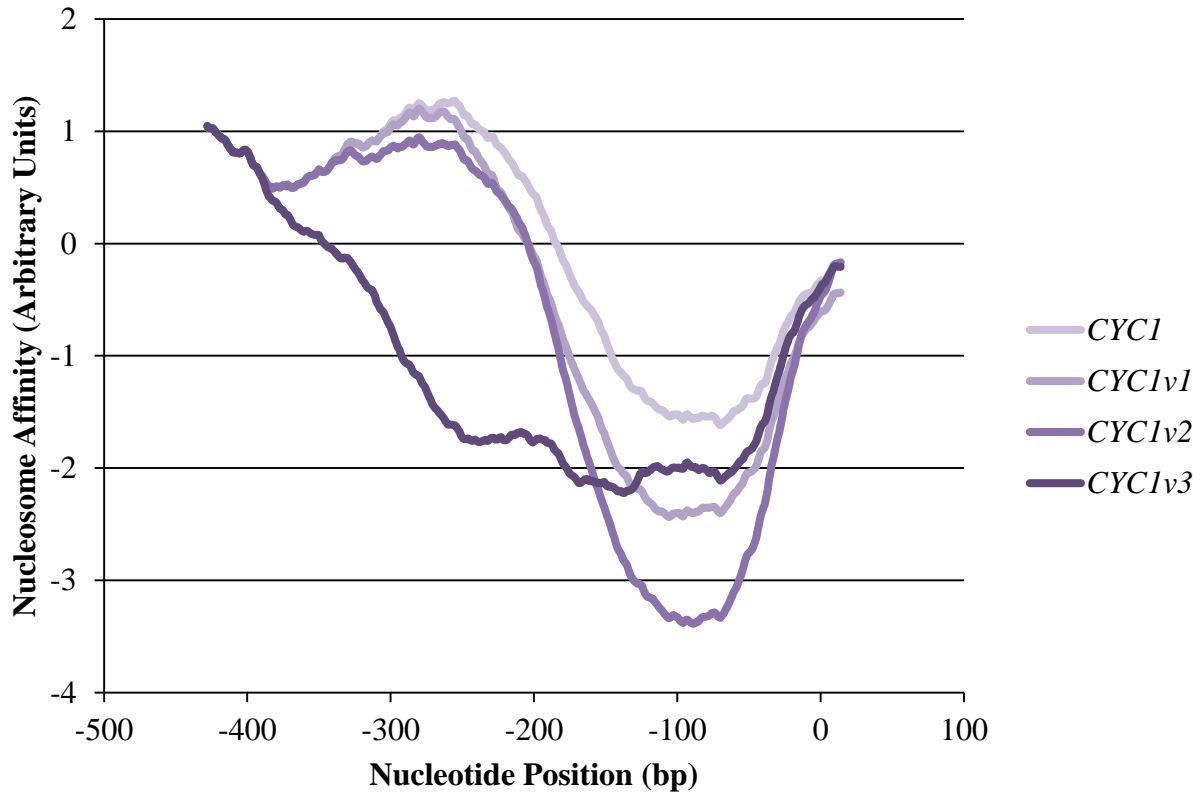

**Supplementary Figure 7.**

Computational nucleosome affinity profiles generated using a hidden Markov model<sup>1</sup> for *CYC1v1-3* and *CYC1* wild-type.

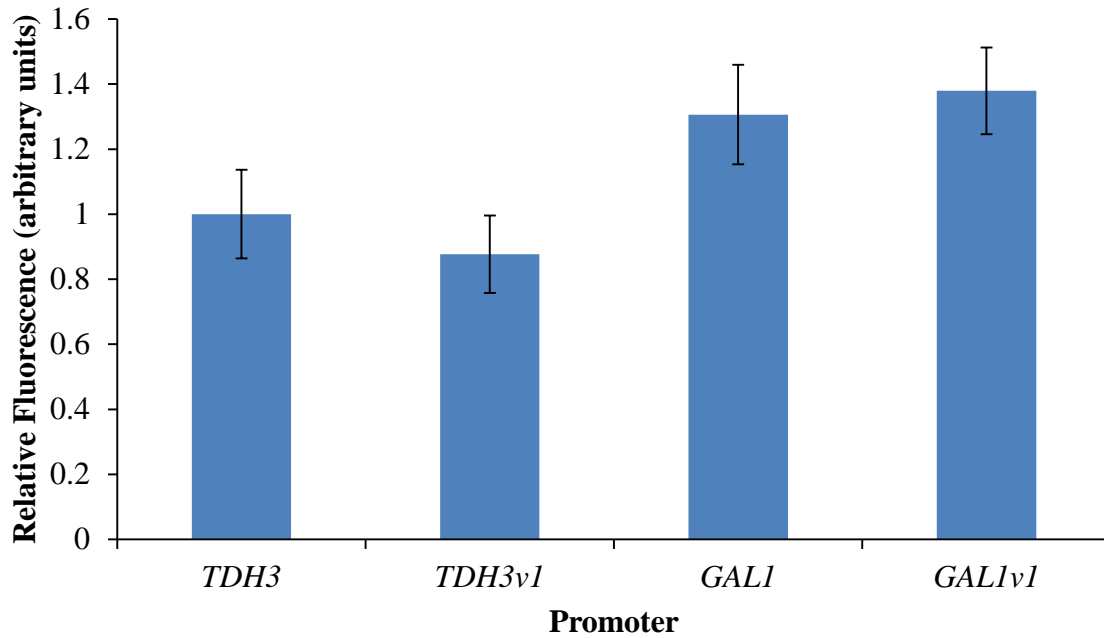

**Supplementary Figure 8.**

*Relative fluorescence of TDH3, GAL1, and redesigned promoter constructs.* Both redesigned promoters had the same fluorescence relative to wild-type, demonstrating that nucleosome architecture is not limiting in these very strong promoters. Error bars represent standard deviation from biological triplicate.



## Supplementary Tables

### Supplementary Table 1.

Sequences of redesigned and synthetic promoters. Underlined sequences in the synthetic promoters *Psynth1* and *Psynth2* are designated transcription factor binding sites and 5' UTR sequences.

| Promoter Name | Sequence                                                                                                                                                                                                                                                                                                                                                                                                                                                                                                                                            |
|---------------|-----------------------------------------------------------------------------------------------------------------------------------------------------------------------------------------------------------------------------------------------------------------------------------------------------------------------------------------------------------------------------------------------------------------------------------------------------------------------------------------------------------------------------------------------------|
| <i>TEF1v1</i> | ATAGCTTCAAATGTTTCTACTCCTTTTTACTCTTCCAGATTTTCTCGGA<br>CTCCGCGCATCGCCGTACCACTTCAAACACCCAAGCACAGCATACTAA<br>ATTTCCCTCTTTCTTCTCTAGGGTGTGTTAATTACCCGTAATAAAGG<br>TTTGAAAAGAAAAAAGACCGCCTCGTTCTTTTTTTTCGTCGAAAA<br>AGGCAATAAAAATTTTTTTCACGTTTCTTTTTCTTGAAAATATTTTTTTG<br>ATTTTTTCTCTTTCGATGACCTCCATTGATATTTAAGTTAATAAACGG<br>TCTTCAATTTCTCAAGTTTCAGTTTCATTTTTTTGTTCTATTACAATTT<br>TTTTACTTCTTGCTCATTAAAAAGAAAGCATAGCAATCTAATCTAAGTTT                                                                                                                      |
| <i>HXT7v1</i> | CTCGTAGGAAAAATTCGGGCCCTGCGTTTTTTTCTGAGGTTCAATTTT<br>TACATTTGCTTCTGCTGGATAATTTTCAGAGAAAAAAGGAAAAATTAT<br>ATGAAAAAAGTTTTTTTCAAGGAAAAAACCTATTTTTTTTCGAGATC<br>CCCTGTAACCTATTGGCAACTGAAAGAATGAAAAGGAAAAAATAAAA<br>AATACTAGAACTGAAAAAAATTAGTATAAATAGAGACGATATATG<br>CCAATACTTCACAATGTTCGAATCTTTTTTTTATTTTCAGCTATTGAAA<br>AAAATAAAACATCAAGAACAACAAGCTCAACTTGTCTTTTCTAAGAAC<br>AAAGAATAAACACAAAAACAAGTTTTTTTAATTTAATCAAAA                                                                                                                                  |
| <i>HIS5v1</i> | AAATGGTTAAAAATTGTTATCATAAATAAGGTGACCGTTATATTGAGA<br>CCTTTCCTGGACAGTAACTAATACAGAAGCCATTGGTAATGCAATAATT<br>TTTTTGATCATGTGACTACGATCCGGGTGAGACTATTAATAAAGGAGT<br>CAAGCATTGAAATAATTAATGACTAATCCGAAGTTAATTGTTAGGAGTC<br>AATTGTTTTTCCAATGAATGGAATCTGAGATGACTAACTACCAATTTT<br>CAATAGTTCATGGTATAGTGACGTAGTTAGTGCTTTTTTTTCTTGGATCT<br>GTTGACTCACTTCAATTGATGTTTCTTACCCTGACATGACATACTTGATT<br>TTTTATCTCTCACGTTATATAACTTGAAAAGGATGCACACAGTTCTGTTC<br>AATATAACCTCCAATATGTAAAAAAGTTTTTTCATTGATTACTCTTAAT<br>TTTTTCTGCTAAACCAGCAGTACGTGTGTGCCGTATATATAAATTA<br>CACT |
| <i>CYC1v1</i> | ATTTGGCGAGCGTTGGTTGGTGGATCAAGCCCACGCGTAGGCAATCCTC<br>GAGCAGATCCGCCAGGCGTGTATATATAGCGTGGATGGCCAGGCAATTT<br>TAGTGCTGACACATACAGGCATATATATATGTGTGCGACGAAAAATGAT<br>CATATGGCATGCATGTGCTCTGTATGTATATAAACTCTTGTTTTCTTTT<br>TTTCTCTAAATATTCTTTCCTTATACATTAGGACCTTTCAGCATAAATT<br>ACTATACTTCTATAGACACGCAAAAACAATACACACACTAA                                                                                                                                                                                                                                  |

| Promoter Name | Sequence                                                                                                                                                                                                                                                                                                                                                                                                                                                                                                                                                                                                                                                                                                                    |
|---------------|-----------------------------------------------------------------------------------------------------------------------------------------------------------------------------------------------------------------------------------------------------------------------------------------------------------------------------------------------------------------------------------------------------------------------------------------------------------------------------------------------------------------------------------------------------------------------------------------------------------------------------------------------------------------------------------------------------------------------------|
| <i>CYC1v2</i> | ATTTGGCGAGCGTTGGTTGGTGGATCAAGCCCACGCGTAGGCAATCCTC<br>GAGCAGATCCGCGAGGCGTGTATATATAGCGTGGATGGCCAGGCAACT<br>TTAGTGCTGACACATACAGGCATATATATATGTGTGCGACGACACATGA<br>TCATATGGCATGTATGTGCTCTGTATGTATATAAACTCTTTTTTCTTTT<br>TTTCTCTAAATTTTTTTTCCTTATACATTAGGACCTTTGCAGCATAAATTA<br>CTATACTTCTATAGACACGCAAACACAAATACACACACTAA                                                                                                                                                                                                                                                                                                                                                                                                         |
| <i>CYC1v3</i> | ATTTGCGCGCGTGGTTAGTAAAAAAGCCCACGCGTAGGGAATCCTC<br>GAGCATATACGCGAGGCGGTATATATAGCGCGTATGTTCAAGGTAAATT<br>TAGTGCTGACACATACAGGCATATATATATGTGCGCGTATATACATGAT<br>TATATGGCATGTATGTGCTCTGTATGTATATAAACTCTTTTTTCTTTT<br>TTCTCTAAATTTTTTTTCCTTATACATTAGGACCTTTGCAGCATAAATTA<br>CTATACTTCTATAGACACGCAAATACAAATACACACACTAA                                                                                                                                                                                                                                                                                                                                                                                                             |
| <i>TDH3v1</i> | AGTTTATCATTATCAATACTCGCCATTTCAAAGAATACGTAAATAATTA<br>ATAGTAGTGATTTTCCTAACTTTTTTTAGTCAAAAAATTAGCCTTTTAAT<br>TCTGCTGTAACCCGTACATGCCCAAATAGGGGGCGGGTTACACAGAAT<br>ATATAACATCGTAGGTGTCTGGGTGAACAGTTTATTCCTGGCATCCACT<br>AAATATAATGGAGCCCGCTTTTTAAGCTGGCATCCAGAAAAAAAATGA<br>ATCCCAGCACCAAATATTTTTTTCTTCACCAACCATCAGTTCATAGGTC<br>CATTCTCTTAGCGCAACTACAGAGAACAGGGGCACAAACAGGCAAAAA<br>ACGGGCACAACCTCAATGGAGTGATGCAACCTGCCTGGAGTAAATGAT<br>GACACAAGGCAATTTACCCGCGCATGTATCTATCTCATTTTTTTACACCT<br>TCTATTACCTTCTGCTCTCTGATTTGGAAAAAGCTGAAAAAAAAGGT<br>TGAAACCAGTTCCTGAAATTATCCCCTACTTGACTAATAAGTATATA<br>AAGACGGTAGGTATTGATTGTAATTCTGTAAATCTATTTCTTAACTTCT<br>TAAATTCTACTTTTATAGTTAGTCTTTTTTTTAGTTTTAAAAAACAGAA<br>CTTAGTTTCGACGGAT |
| <i>GAL1v1</i> | ACGGATTAGAAGCCGCCGAGCGGGCGACAGCCCTCCGACGGAAGACTC<br>TCTCCGCGCGTCCGCGTCTTCACCGGTCGCGTTCCTGAAACGCAGATG<br>TGCCTCGCGCCGCACTGCTCCGAAAAATAAAGATTCTACAATACTAGCT<br>TTTTTGGTTATGAAGAGGAAAAATTGGCAGTAACCTGGCCCCACAAACC<br>TTCAAATTAACGAATCAAATTAACAACCATAGGATGATAATGCGATTAG<br>TTTTTTAGCCTTATTTCTGGGGTAATTAATCAGCGAAGCGATGATTTTTG<br>ATCTATTAACAGATATATAAATGAAAAAGCTGCATAACCACTTAACTA<br>ATACTTTCAACATTTTCAGTTTTTATTACTTCTTATTCAAATGTCATAAA<br>AGTATCAACAAAAAATTGTTAATATACCTCTATACTTTAACGTCAAGGA<br>GAAAAAC                                                                                                                                                                                                                         |

| Promoter Name    | Sequence                                                                                                                                                                                                                                                                                                                                                                                                                                                                                                                      |
|------------------|-------------------------------------------------------------------------------------------------------------------------------------------------------------------------------------------------------------------------------------------------------------------------------------------------------------------------------------------------------------------------------------------------------------------------------------------------------------------------------------------------------------------------------|
| <i>Psynth1v1</i> | <u>TCCGGGTAACGCCGACACAGTAAGTAACGAGATGTATGGGTGTCCTAAC</u><br><u>TAAAAGGCTTCCA</u> ACTCAACATTGAATCAGGTAATCCTAGATCAAGGCT<br><u>TCCATACACAGGTTTATATTAATACATATACGACA</u> ACTCTCCAATTCGCT<br>CATAATTACAACAAAGATCGAACTGAGAGAGACTTAGACTCGTACAAC<br>TACATTTTTTCGTAACTTTTTAACATACGCGAGGGTATTAAACTTAGCTG<br>ACGCAACTCTAGTTGTATCTCGCGATAATTTCTTTTTACTTGTCTATTTAT<br><u>AAAACCAAGCTAATAACTTCATACGTCTTATTGTATTTAGACTATTTCT</u><br><u>TTTTAACCTA</u> ACTATAGCAGAACCCGCGGGTAATTACTTAAAACACCAA<br><u>GAACTTAGTTTCGAATAAACACACATAAACAAACAAA</u> |
| <i>Psynth1v2</i> | <u>TCCGGGTAACGCCGAAAAAATAAGTAACGCGATGTATGGGTGTA</u> ACTAA<br>AAAAAAGGCTTCCAATAAAAAAATTGAATCAGGTAATCCTATATCAAGG<br><u>CTTCCA</u> TATATAGGTTTATATTAATACATATACGAAAAAACTCTTTTTCG<br>CGCATAATTATAATAAAAAATCGAACTGAGAGAGACTTAGACTCGTACA<br>ACTATTTTTTTTGTAAATTTTTTATATACGCGCGGGTATTAAACTTAGCT<br>GACGCGATTCTATTTGTATCTCGCGATAATTTCTTTTTTCTTCTCTATTTA<br><u>TAAAACCAAGCTAATAACTTCATACGTCTTTTGTATATAGACTTTTTC</u><br><u>TTTTTTTCTA</u> ACTATAGGAGAACCCGCGGGTAATTTTTTAAAACACCAA<br><u>GAACTTAGTTTCGAATAAACACACATAAACAAACAAA</u>        |
| <i>Psynth1v3</i> | <u>TCCGGGTAACGCCGAAAAAATTATATACGCGATGTATGGGTGTATTA</u> AA<br>AAAAAAGGCTTCCAATAAAAAAAGAATCAGGTAATCCTTTTTCGCGGCT<br><u>TCCATATATATTTTTTTATTAATACATATACGAAAAAAGTCTTTTTCGCG</u><br>GGTAATTATAATAAAAAATCGAACTGAGAGAGACTTTCACACGTACTACT<br>ATTTTTTTTATTATTTTTTTTATATACGCGCGGGTAAAAAAATTAACTAA<br>CGCGATTTTTTTTCTTTTCGCGCGAAAATTTCTTTTTTCTTCTCTATTTATA<br><u>AAAAGGAAGGAAAAAAGTTCTTACCTCTTTTTGTATATACACTTTTTCTT</u><br><u>TTTTTCTTAGTAAAGGAGAACGCGCGGGTATTTTTTTAAAACACCAAG</u><br><u>AACTTAGTTTCGAATAAACACACATAAACAAACAAA</u>        |
| <i>Psynth2v1</i> | <u>TCCGGGTA</u> ACTGCGGGTGACCGCAATCTTAGATGTATGGGTGTTAACTG<br>AGCTAGGCTTCCATGCATTTAGAGAACTTATTAACTGAATAGTTAGGCT<br><u>TCCA</u> AACGAGCTAGTTCTCGCGTGTATCTAAAAAAATTCTAGACTGGT<br>GATACTTATAACTATAAAAAAACTGACACTTCTCCCTAATCGTAGTATT<br>GTATATATTTTTTTAAAAAAAACTTGCAACCATTAAAACACCAAGAAC<br><u>TTAGTTTCGAATAAACACACATAAACAAACAAA</u>                                                                                                                                                                                               |
| <i>Psynth2v2</i> | <u>TCCGGGTA</u> ACCGCGGGTAACCTCAATCTTAGATGTATGGGTGTTAACTG<br>AGCTCGGCTTCCATGTATTAAAAAAAATTATTAACTGAAAAAAAGGCT<br><u>TCCA</u> AACTAGTTTTTTTTTCGCGTGTGATCAAAAAAAATTCTAGACGGGT<br>AATACATATAAGTATAAAAAAACTGACACTTCTCCCTAATCGTAGTATT<br>GTATATATTTTTTTAAAAAAAACTTGCAACCATTAAAACACCAAGAAC<br><u>TTAGTTTCGAATAAACACACATAAACAAACAAA</u>                                                                                                                                                                                              |

| Promoter Name    | Sequence                                                                                                                                                                                                                                                                                                                                               |
|------------------|--------------------------------------------------------------------------------------------------------------------------------------------------------------------------------------------------------------------------------------------------------------------------------------------------------------------------------------------------------|
| <i>Psynth2v3</i> | <u>TCCGGGTAACCGCGGGTAACATATATATTAGATGTATGGGTGTAAAAAA</u><br><u>AGCGCGGCTTCCATGTATTAATAAAAAAATTTTTTCTGAAAAAAAAAGGCT</u><br><u>TCCATACTAATTTTTTTTCGCGCGGGTAGAAAAAAAAATACTAGTCGGGT</u><br><u>AATACATATAAGTATAAAAAAAGAGACACTTCTCCCTAATCGTACTATT</u><br><u>GTATATATTTTTTTAAAAAAAAGTTCGAAGCTTTTAAACACCAAGAAC</u><br><u>TTAGTTTCGAATAAACACACATAAACAAACAAA</u> |

**Supplementary Table 2.**

*Glycolytic promoter architecture and design of Psynth1 and Psynth2.* The positions and lengths between various transcription factors in a collection of yeast glycolytic promoters were catalogued in order to design *Psynth1* and *Psynth2*. All lengths refer to the distance in basepairs between the start of each binding site. Column Descriptions: 1. Number of Gcr1p binding sites. 2. Number of Rap1p binding sites. 3. Number of Reb1p binding sites. 4. 5' UTR length. 5. Length between TATA box and transcription start site. 6. Length between Gcr1p binding site and TATA box. 7. Length between two Gcr1p binding sites when they occur in close proximity to a Rap1p or Reb1p binding site. Values of N/A mean that the sites did not occur in a pair. A value of 40 bp was chosen for the synthetic promoters because *PGK1* and *GPM1* were identified as outliers in this category. 8. Length between Rap1p binding site and Gcr1p binding site when they occur in close proximity to each other. Values of N/A mean that the sites did not occur close together or there was no Rap1p binding site. 9. Length between Rap1p and Reb1p binding sites. Values of N/A mean that the promoter did not have both a Rap1p site and a Reb1p site. The minimum distance was chosen in this category because the three values had a large distribution and some of the promoters that lack a Reb1p binding site have an Abf1 binding site in a similar position.

| <b>Promoter</b> | <b>1<br/>Gcr1</b> | <b>2<br/>Rap1</b> | <b>3<br/>Reb1</b> | <b>4<br/>5'<br/>UTR</b> | <b>5<br/>TATA<br/>-&gt; TSS</b> | <b>6<br/>Gcr1<br/>-&gt;<br/>TATA</b> | <b>7<br/>Gcr1<br/>-&gt;<br/>Gcr1</b> | <b>8<br/>Rap1<br/>-&gt;<br/>Gcr1</b> | <b>9<br/>Rap1<br/>-&gt;<br/>Reb1</b> |
|-----------------|-------------------|-------------------|-------------------|-------------------------|---------------------------------|--------------------------------------|--------------------------------------|--------------------------------------|--------------------------------------|
| <i>TDH3</i>     | 2                 | 1                 | 1                 | 41                      | 93                              | 309                                  | 38                                   | 27                                   | 31                                   |
| <i>FBA1</i>     | 3                 | 1                 | 0                 | 11                      | 105                             | 255                                  | 42                                   | N/A                                  | N/A                                  |
| <i>TPI1</i>     | 2                 | 0                 | 1                 | 31                      | 140                             | 167                                  | 40                                   | N/A                                  | N/A                                  |
| <i>ADH1</i>     | 2                 | 1                 | 0                 | 39                      | 82                              | 207                                  | N/A                                  | N/A                                  | N/A                                  |
| <i>PGK1</i>     | 2                 | 1                 | 1                 | 42                      | 104                             | 279                                  | 17                                   | 24                                   | 88                                   |
| <i>CDC19</i>    | 5                 | 1                 | 1                 | 29                      | 163                             | 64                                   | 47                                   | 12                                   | 170                                  |
| <i>TDH2</i>     | 4                 | 0                 | 1                 | 33                      | 93                              | 170                                  | 45                                   | N/A                                  | N/A                                  |
| <i>GPM1</i>     | 2                 | 1                 | 0                 | 11                      | 128                             | 196                                  | 16                                   | 37                                   | N/A                                  |
| <b>Average</b>  | <b>2.75</b>       | <b>0.75</b>       | <b>0.625</b>      | <b>29.6</b>             | <b>113.5</b>                    | <b>205.9</b>                         | <b>35</b>                            | <b>25</b>                            | <b>96.3</b>                          |
| <b>Minimum</b>  | <b>2</b>          | <b>0</b>          | <b>0</b>          | <b>11</b>               | <b>82</b>                       | <b>64</b>                            | <b>16</b>                            | <b>12</b>                            | <b>31</b>                            |
| <i>Psynth1</i>  | 2                 | 1                 | 1                 | 41                      | 100                             | 200                                  | 40                                   | 24                                   | 30                                   |
| <i>Psynth2</i>  | 2                 | 1                 | 1                 | 41                      | 80                              | 65                                   | 40                                   | 24                                   | 30                                   |

**Supplementary Table 3.**

Primer sequences for cloning of promoters, *yECitrine* and *LacZ* genes, knockout and integration cassettes, and primers for qPCR of *yECitrine*. All redesigned and synthetic promoters were cloned using the “general promoter primers” with the exception of *HIS5v1*, which was cloned using the *HIS5* promoter primer set.

| <b>Primer set name</b>                    | <b>Forward Primer</b>                                                | <b>Reverse Primer</b>                                                  |
|-------------------------------------------|----------------------------------------------------------------------|------------------------------------------------------------------------|
| <i>yECitrine</i>                          | GCGCTACTAGTATGTCTAAAGG<br>TGAAGAATTATTCCTGG                          | ACGCGTCGACTTATTTGTACAATT<br>CATCCATACCATG                              |
| <i>LacZ</i>                               | GCGCTTCTAGAACTAGTATGAC<br>CATGATTACGGATTCCT                          | ACGCGTCGACTTATTTTTGACACC<br>AGACCAACTG                                 |
| General promoter primers                  | TAAAGGGAACAAAAGCTGGAGCT<br>C                                         | CAGTGAATAATTCTTCACCTTTAG<br>ACATACTAGTTCTAGA                           |
| <i>HXT7</i> promoter                      | TGACTGAGCTCCTCGTAGGAACA<br>ATTTCGGG                                  | GCGCTACTAGTTCTAGATTTTTG<br>ATAAAATTAATAAACTTTTTGT<br>TTT               |
| <i>HIS5</i> promoter                      | TGACTGAGCTCAAATGGTTAAAA<br>ATTGTTATCATA                              | GCGCTACTAGTTCTAGAAGTGTA<br>ATTTAATATATACGGCA                           |
| <i>P<sub>CYC1</sub></i> knockout cassette | TGAATCTAAAATTCCCGGGAGCA<br>AGATCAAGATGTTTTACAGCTG<br>AAGCTTCGTACGC   | TAGCACCTTTCTTAGCAGAACCGG<br>CCTTGAATTCAGTCATGCATAGGC<br>CACTAGTGGATCTG |
| <i>K. lactis URA3</i>                     | TGACTGAGCTCCAGCTGAAGCTT<br>CGTACGC                                   | GCATAGGCCACTAGTGGATCTG                                                 |
| <i>TRP1</i> integration cassette          | TGGAGATATTCCTTATGGCATGTC<br>TGGCGATGATAATAAAGGGAACA<br>AAAGCTGGAGCTC | ACACCAATAACGCCATTTAATCTA<br>AGCGCATCACCAACGGTACCCAAT<br>TCGCCCTATAGT   |
| <i>yECitrine</i> qPCR primers             | TTCTGTCTCCGGTGAAGGTGAA                                               | TAAGGTTGGCCATGGAAGTGGCAA                                               |
| <i>ALG9</i> qPCR primers                  | ATCGTGAAATTGCAGGCAGCTTG<br>G                                         | CATGGCAACGGCAGAAGGCAATA<br>A                                           |

**Supplementary Table 4.**

Primers for nucleosome mapping tiling array. Primers sets marked with a \* were used for both *CYC1* and *CYC1v3*. All other sets were used for a specific promoter as noted.

| Primer set          | Mid-amplicon location relative to start codon | Forward primer                  | Reverse primer                         |
|---------------------|-----------------------------------------------|---------------------------------|----------------------------------------|
| CYC1_1              | -313.5                                        | CGCGCAATTAACC<br>CTCACTAA       | AACCAACGCTCGC<br>CAAAT                 |
| CYC1_2              | -271.5                                        | ATTTGGCGAGCGT<br>TGGT           | CGGATCTGCTCGA<br>GGATTG                |
| CYC1_3              | -222.5                                        | GCAATCCTCGAGC<br>AGATCC         | GCCTGTATGTGTC<br>AGCACTAA              |
| CYC1_4              | -189                                          | ATGGCCAGGCAAC<br>TTTAG          | GTGTCGTCGCACA<br>CATA                  |
| CYC1_5              | -170.5                                        | TAGTGCTGACACA<br>TACAGG         | CACATGCATGCCA<br>TATGAT                |
| CYC1_6              | -120.5                                        | GTGCGACGACACA<br>TGAT           | GGTCCTAATGTAT<br>AAGGAAAGAATA<br>TTTAG |
| CYC1v3_1            | -315.5                                        | CGCGCAATTAACC<br>CTCACTAAA      | AACGCGCGCGAA<br>ATGAG                  |
| CYC1v3_2            | -270.5                                        | GCGCGCGTTGGTT<br>AGTAAA         | ATATGCTCGAGGA<br>TTCCCTACG             |
| CYC1v3_3            | -233.5                                        | CCCACGCGTAGGG<br>AATC           | TCAGCACTAAATT<br>TACCTGAACATAC         |
| CYC1v3_4            | -208.5                                        | GTATATATAGCGC<br>GTATGTTTCAGGTA | GCCTGTATGTGTC<br>AGCACTAA              |
| CYC1v3_5            | -179.5                                        | TAGCGCGTATGTT<br>CAGGTA         | CAGAGCACATACA<br>TGCCATATAATC          |
| CYC1v3_6            | -167                                          | GTGCTGACACATA<br>CAGGCATA       | CAGAGCACATACA<br>TGCCATATAATC          |
| CYC_7*              | -52                                           | TTTCCTTATACATT<br>AGGACCTTTGCAG | AGTGTGTGTATTT<br>GTATTTGCGTGT          |
| CYC_8*              | -11                                           | GACACGCAAATAC<br>AAATACACACA    | TTGGGACAACACC<br>AGTGAATAA             |
| CYC_9*              | 129.5                                         | TTCTGTCTCCGGT<br>GAAGGTGAA      | TAAGGTTGGCCAT<br>GGAAGTGGCAA           |
| Ampicillin control* | N/A                                           | TGTAACCTCGCCTT<br>GATCGTTGGGA   | TTGTTGCCATTGC<br>TACAGGCATCG           |

**Supplementary Reference**

1. Xi, L. et al. Predicting nucleosome positioning using a duration Hidden Markov Model. *BMC Bioinformatics* **11**, 346 (2010).
